# Supplementary material for: Qki regulates myelinogenesis through Srebp2-dependent cholesterol biosynthesis
Source: eLife. 2021 May 4;10:e60467. doi: 10.7554/eLife.60467 (PMC8139834; doi:10.7554/eLife.60467)
Supplement: Figure 1—source data 1. [file elife-60467-fig1-data1.xlsx]

## Sheet: Sheet1
Figure 1-source data 1
Exact P-values for statistical analysis
		P-value
Panel C	Latency to fall	6.73e-12
Panel D	Body weight	2.41e-08
Panel E	Overall Survival	<0.0001
Panel F	% Area MPB+	4.83e-06
	% Area PLP+	1.55e-07
	% Area MAG+	8.17e-06
	% Area GFP+	1.29e-06
	Iba1+ cells/mm2	0.00056
Panel G	% Area MPB+	0.00013
	Iba1+ cells/mm2	0.00074
Panel H	% myelinated axons	0.00016
	g-ratio	0.00038
Panel I	APP+/mm2	0.18778
Figure 1-figure supplement 1
		P-value
Panel A	QkL/L vs. Nestin-CreERT2;QkL/L	<0.0001
	Nestin-CreERT2;WT vs. Nestin-CreERT2;QkL/L	<0.0001
	Nestin-CreERT2;QkL/+ vs. Nestin-CreERT2;QkL/L	<0.0001
Panel G	Total nodes/mm2 - 7 days after injection	0.0382357
	Total nodes/mm2 - 10 days after injection	0.0125338
	Total nodes/mm2 - 14 days after injection	0.0268726
Pnale H	% of Nodes with both paranodes - 7 days after injection	0.0105339
	% of Nodes with both paranodes - 10 days after injection	0.000392566
	% of Nodes with both paranodes - 14 days after injection	1.23623e-05
Panel I	Axonal diameter	0.136462
Panel J	# Axons/100mm2	0.780972
Panel L	AIS length (mm)	0.5034
