# Supplementary material for: Qki regulates myelinogenesis through Srebp2-dependent cholesterol biosynthesis
Source: eLife journal article supplement (doi:10.7554/elife.60467), 2021-05-04
Supplement: supp [file elife-60467-supp-v1.zip]

Archive with 18 entries (18 files):
- elife_poa_e60467_Video_1.mp4
- elife_poa_e60467_Video_2.mp4
- elife_poa_e60467_Transparent_Reporting_File.docx
- elife_poa_e60467_Figure_1_figure_supplement_1.pdf
- elife_poa_e60467_Figure_2_figure_supplement_1.pdf
- elife_poa_e60467_Figure_2_figure_supplement_2.pdf
- elife_poa_e60467_Figure_4_figure_supplement_1.pdf
- elife_poa_e60467_Figure_4_figure_supplement_2.pdf
- elife_poa_e60467_Figure_5_figure_supplement_1.pdf
- elife_poa_e60467_Figure_6_figure_supplement_1.pdf
- elife_poa_e60467_Figure_1_source_data_1.xlsx
- elife_poa_e60467_Figure_2_source_data_1.xlsx
- elife_poa_e60467_Figure_3_source_data_1.xlsx
- elife_poa_e60467_Figure_4_source_data_1.xlsx
- elife_poa_e60467_Figure_5_source_data_1.xlsx
- elife_poa_e60467_Figure_6_source_data_1.xlsx
- elife_poa_e60467_Figure_7_source_data_1.xlsx
- elife_poa_e60467_Supplementary_File_1.docx
