# Supplementary material for: Qki regulates myelinogenesis through Srebp2-dependent cholesterol biosynthesis
Source: eLife journal article supplement (doi:10.7554/elife.60467), 2021-05-04
Supplement: supp [file elife-60467-supp-v1.zip › elife_poa_e60467_Figure_2_source_data_1.xlsx]

## Sheet: Sheet1
Figure 2-source data 1
Exact P-values for statistical analysis
		P-value			P-value			P-value
Panel A	Pdgfra+ cells/mm2	0.0031		Pdgfra+Qki+	<0.0001		Pdgfra+Qki-	<0.0001
Panel B	Aspa+ cells/mm2	0.1618		Aspa+Qki+	<0.0001		Aspa+Qki-	<0.0001
Panel C	Gstpi+ cells/mm2	0.6495		Gstpi+Qki+	<0.0001		Gstpi+Qki-	<0.0001
Figure 2-figure supplement 1
		P-value			P-value			P-value
Panel A	CC-1+ cells/mm2	<0.0001		CC-1+Qki+	<0.0001		CC-1+Qki-	0.9993
Panel B	Olig2+ cells/mm2	0.0002		Olig2+Qki+	<0.0001		Olig2+Qki-	0.0008
Panel C	TUNEL+ cells/mm2	0.8663
Figure 2-figure supplement 2
		P-value
Panel A	NeuN+ cells/mm2	0.923393
Panel B	Sox9+Gfap+GFP+/Sox9+Gfap+(%)	0.9466
