# Supplementary material for: Qki regulates myelinogenesis through Srebp2-dependent cholesterol biosynthesis
Source: eLife journal article supplement (doi:10.7554/elife.60467), 2021-05-04
Supplement: supp [file elife-60467-supp-v1.zip › elife_poa_e60467_Figure_3_source_data_1.xlsx]

## Sheet: Sheet1
Figure 3-source data 1
Exact P-values for statistical analysis
Figure 3		P-value
Panel B	MBP-PLP colocalization rate	1.13898e-06
Panel C	MBP-MAG colocalization rate	5.02118e-07
Panel D	% Area fluoromyelin+	8.72612e-07
Panel E	Relative fluoromyelin/PLP	1.48214e-06
