# Supplementary material for: Qki regulates myelinogenesis through Srebp2-dependent cholesterol biosynthesis
Source: eLife journal article supplement (doi:10.7554/elife.60467), 2021-05-04
Supplement: supp [file elife-60467-supp-v1.zip › elife_poa_e60467_Figure_4_source_data_1.xlsx]

## Sheet: Sheet1
Figure 4-source data 1
Exact P-values for statistical analysis
		P-value
Panel C	Latency to fall	9.04177e-06
Panel D	Body weight	4.37627e-06
Panel E	Overall Survival	<0.0001
Panel F	% Area MPB+	7.19557e-05
	% Area GFP+	7.13678e-05
	Iba1+ cells/mm2	2.44502e-06
Panel G	% Area fluoromyelin+	0.00240978
Panel H	% myelinated axons	0.00829143
		P-value			P-value			P-value
Panel I	Aspa+ cells/mm2	>0.9999		Aspa+Qki+	0.0051		Aspa+Qki-	0.0041
Figure 4-figure supplement 1
		P-value
Panel A	QkL/L vs. Plp-CreERT2;QkL/L	<0.0001
	Plp-CreERT2;WT vs. Plp-CreERT2;QkL/L	<0.0001
	Plp-CreERT2;QkL/+ vs. Plp-CreERT2;QkL/L	<0.0001
Panel C	g-ratio	0.0237781
Panel D	Axonal diameter	0.687413
Panel E	# Axons/100mm2	0.526981
Panel F	Pdgfrα+GFP+ cells/mm2	0.0903
Figure 4-figure supplement 2
		P-value
Panel A	Pdgfrα+Ki67+ cells/mm2	0.8328
Panel B	Olig2+Ki67+ cells /mm2	0.6164
