# Supplementary material for: Qki regulates myelinogenesis through Srebp2-dependent cholesterol biosynthesis
Source: eLife journal article supplement (doi:10.7554/elife.60467), 2021-05-04
Supplement: supp [file elife-60467-supp-v1.zip › elife_poa_e60467_Figure_5_source_data_1.xlsx]

## Sheet: Sheet1
Figure 5-source data 1
Exact P-values for statistical analysis
		P-value
Panel E	Relative Hmgcs1 expression	1.81599e-09
	Relative Hmgcr expression	0.00288491
	Relative Mvk expression	2.80586e-05
	Relative Pmvk expression	0.00250267
	Relative Mvd expression	2.39977e-07
	Relative Idi1 expression	4.65574e-07
	Relative Fdps expression	4.37417e-08
	Relative Fdft1 expression	0.021696
	Relative Sqle expression	2.997e-05
	Relative Lss expression	0.000786215
	Relative Dhcr24 expression	1.03305e-05
	Relative Cyp51 expression	2.80982e-05
	Relative Tm7sf2 expression	0.0426162
	Relative Msmo1 expression	8.27226e-05
	Relative Nsdhl expression	0.000108682
	Relative Hsd17b7 expression	0.464459
Panel F	Relative Hmgcs1 expression	0.000141503
Panel G	Relative Fdps expression	3.48477e-05
Panel H	Relative Hmgcs1 expression	0.000474319
	Relative Hmgcs2 expression	0.000188504
	Relative Hmgcr expression	0.0301229
	Relative Fdps expression	0.0171403
	Relative Lss expression	0.000268137
Panel I	Total cholesterol	0.000893411
	Free cholesterol	0.00228277
	Cholesteryl ester	0.0379359
Figure 5-figure supplement 1
		P-value
Panel B	Relative Hmgcs1 expression	7.78829e-05
Panel C	Relative Fdps expression	0.000904562
