# Supplementary material for: Qki regulates myelinogenesis through Srebp2-dependent cholesterol biosynthesis
Source: eLife journal article supplement (doi:10.7554/elife.60467), 2021-05-04
Supplement: supp [file elife-60467-supp-v1.zip › elife_poa_e60467_Figure_6_source_data_1.xlsx]

## Sheet: Sheet1
Figure 6-source data 1
Exact P-values for statistical analysis
		P-value
Panel A	Relative Srebp2 expression	0.714249
Panel J			P-value			P-value
	Qki-5 ChIP-qPCR	Hmgcs1	<0.0001		Hmgcr	<0.0001
	Srebp2 ChIP-qPCR	Hmgcs1	<0.0001		Hmgcr	<0.0001
	Pol II ChIP-qPCR	Hmgcs1	<0.0001		Hmgcr	<0.0001
