# Supplementary material for: Qki regulates myelinogenesis through Srebp2-dependent cholesterol biosynthesis
Source: eLife journal article supplement (doi:10.7554/elife.60467), 2021-05-04
Supplement: supp [file elife-60467-supp-v1.zip › elife_poa_e60467_Figure_7_source_data_1.xlsx]

## Sheet: Sheet1
Figure 7-source data 1
Exact P-values for statistical analysis
			P-value
Panel D	Average occupancies of Srebp2		<0.0001
Panel E	Average occupancies of Pol II		<0.0001
Panel H	Srebp2 ChIP-qPCR	Hmgcs1	0.000338205
	Srebp2 ChIP-qPCR	Hmgcr	5.19952e-05
	Srebp2 ChIP-qPCR	Non-target	0.642909
