# Supplementary figures and images for: Qki regulates myelinogenesis through Srebp2-dependent cholesterol biosynthesis
Source: eLife journal article supplement (doi:10.7554/elife.60467), 2021-05-04

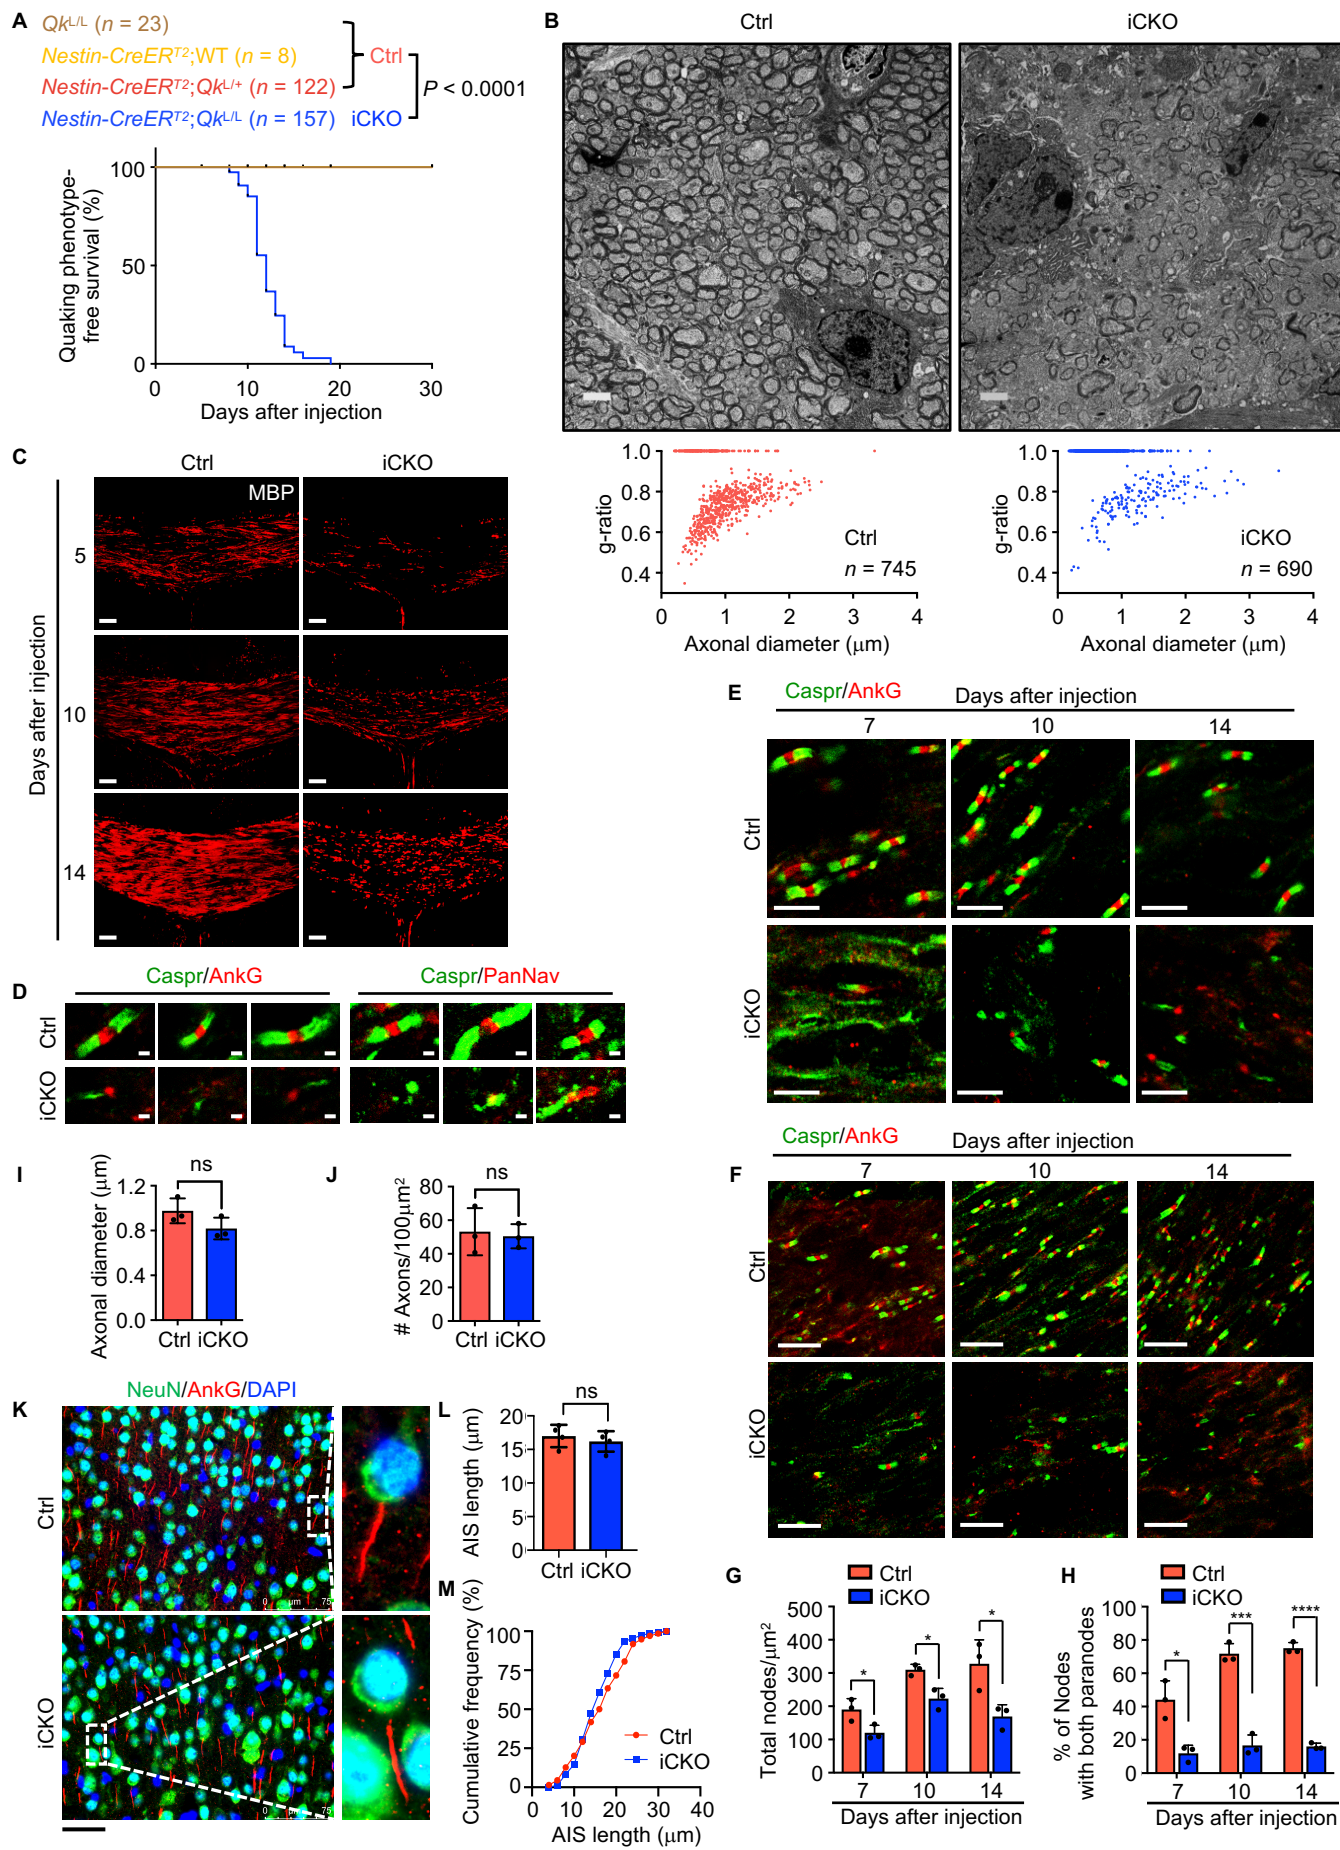

Figure 1-figure supplement 1

Supplement: supp [file elife-60467-supp-v1.zip › elife_poa_e60467_Figure_1_figure_supplement_1.pdf]

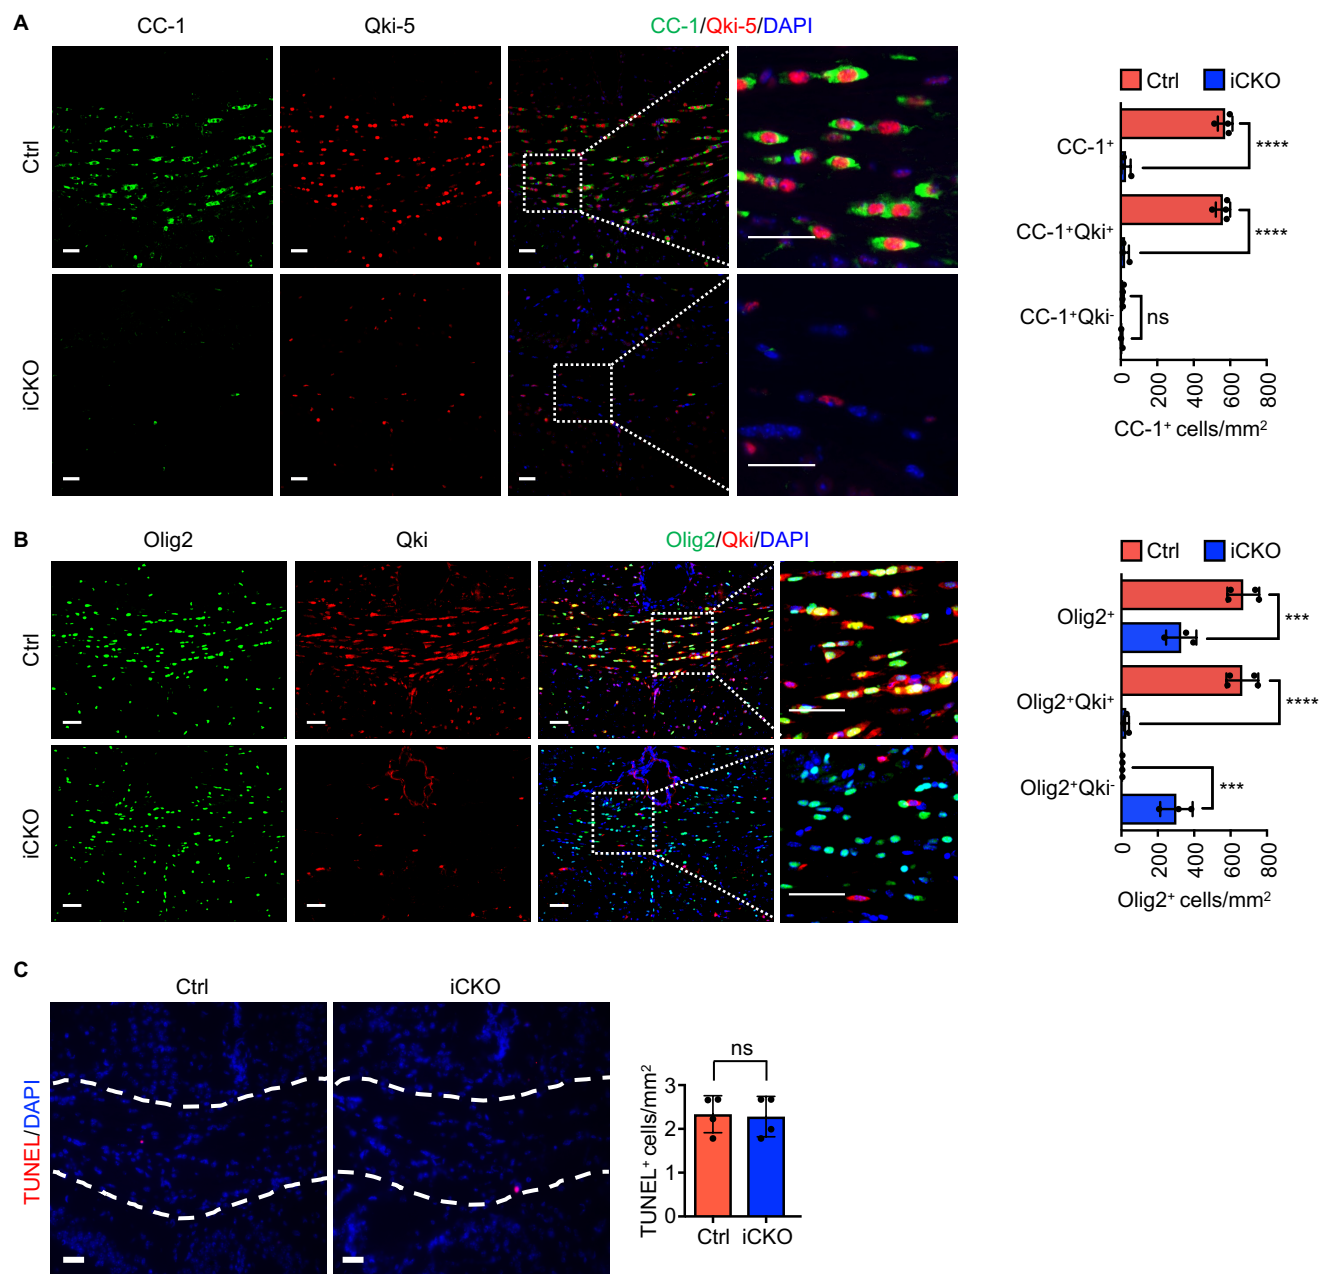

Figure 2-figure supplement 1

Supplement: supp [file elife-60467-supp-v1.zip › elife_poa_e60467_Figure_2_figure_supplement_1.pdf]

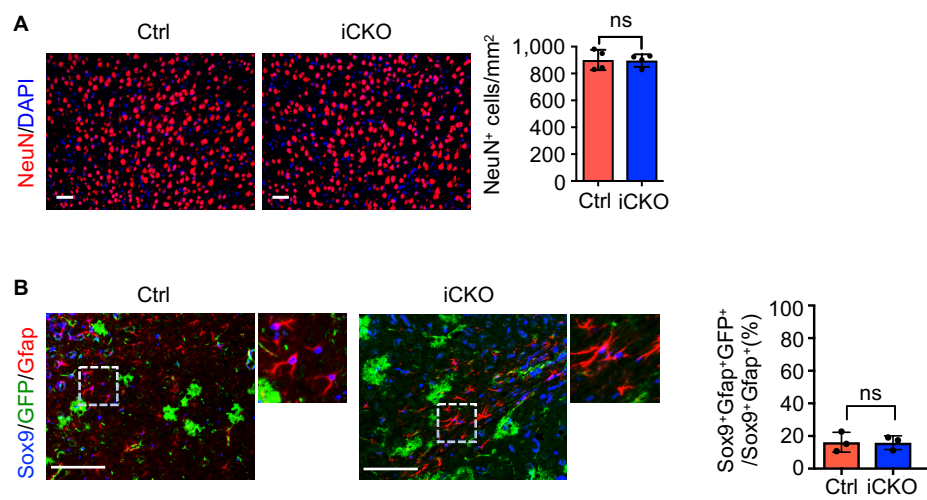

Figure 2-figure supplement 2

Supplement: supp [file elife-60467-supp-v1.zip › elife_poa_e60467_Figure_2_figure_supplement_2.pdf]

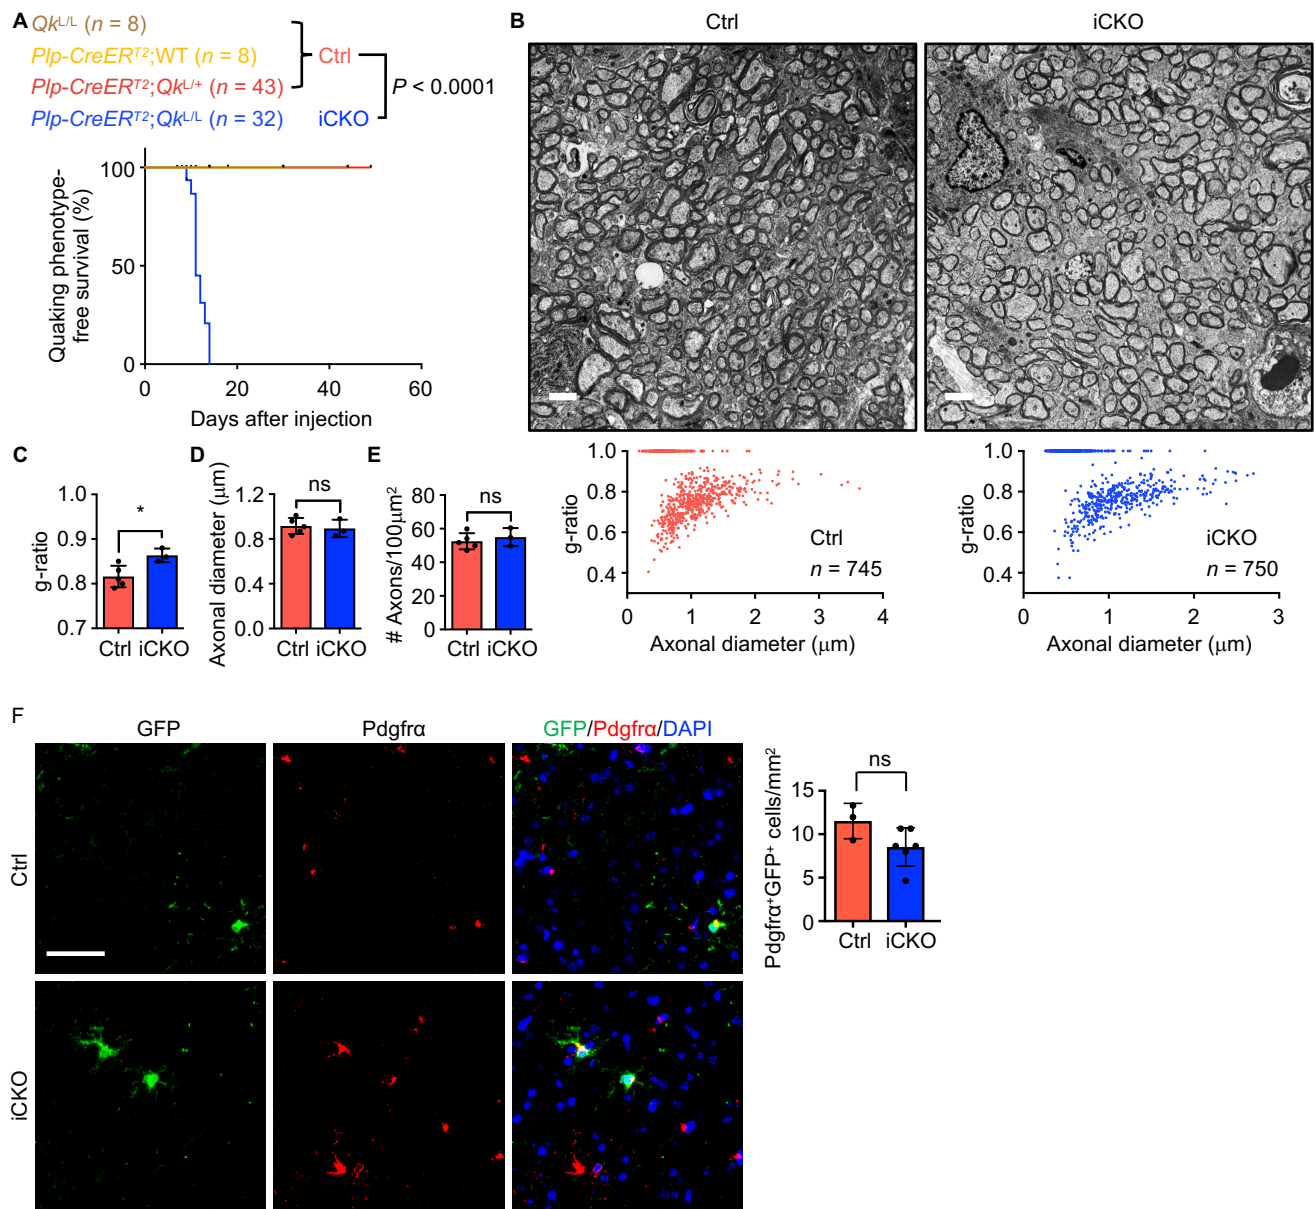

Figure 4-figure supplement 1

Supplement: supp [file elife-60467-supp-v1.zip › elife_poa_e60467_Figure_4_figure_supplement_1.pdf]

**A**

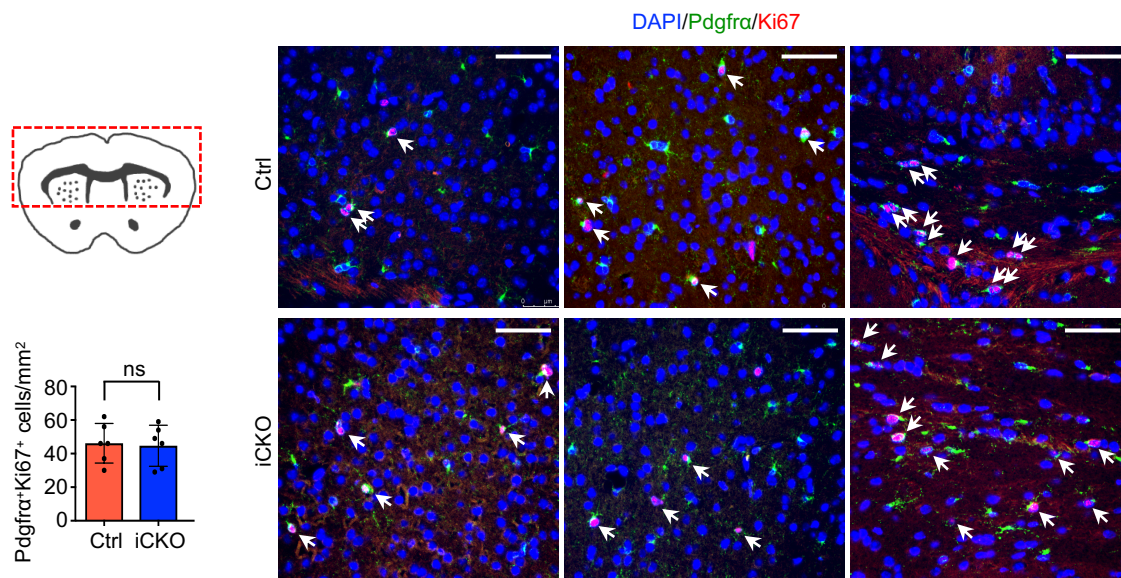

**B**

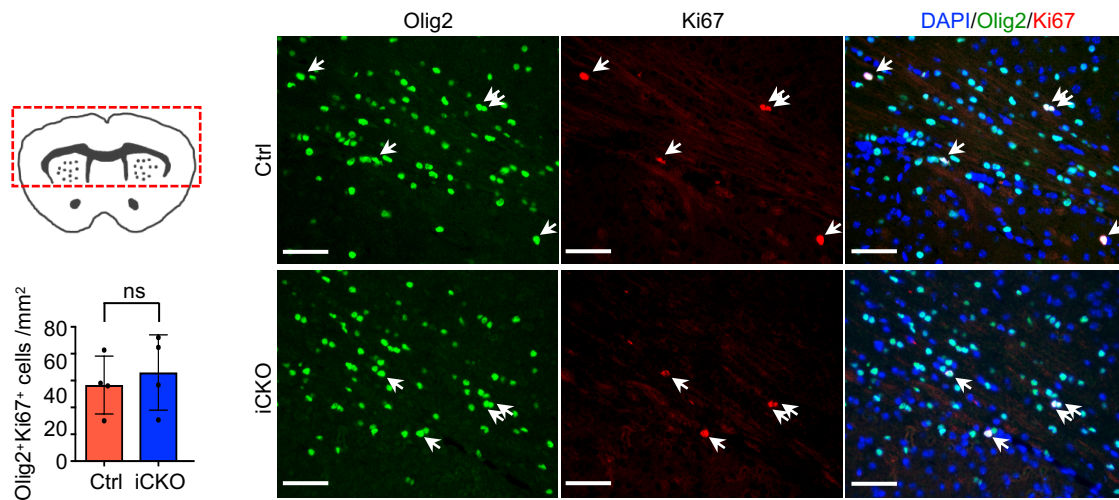

Figure 4-figure supplement 2

Supplement: supp [file elife-60467-supp-v1.zip › elife_poa_e60467_Figure_4_figure_supplement_2.pdf]

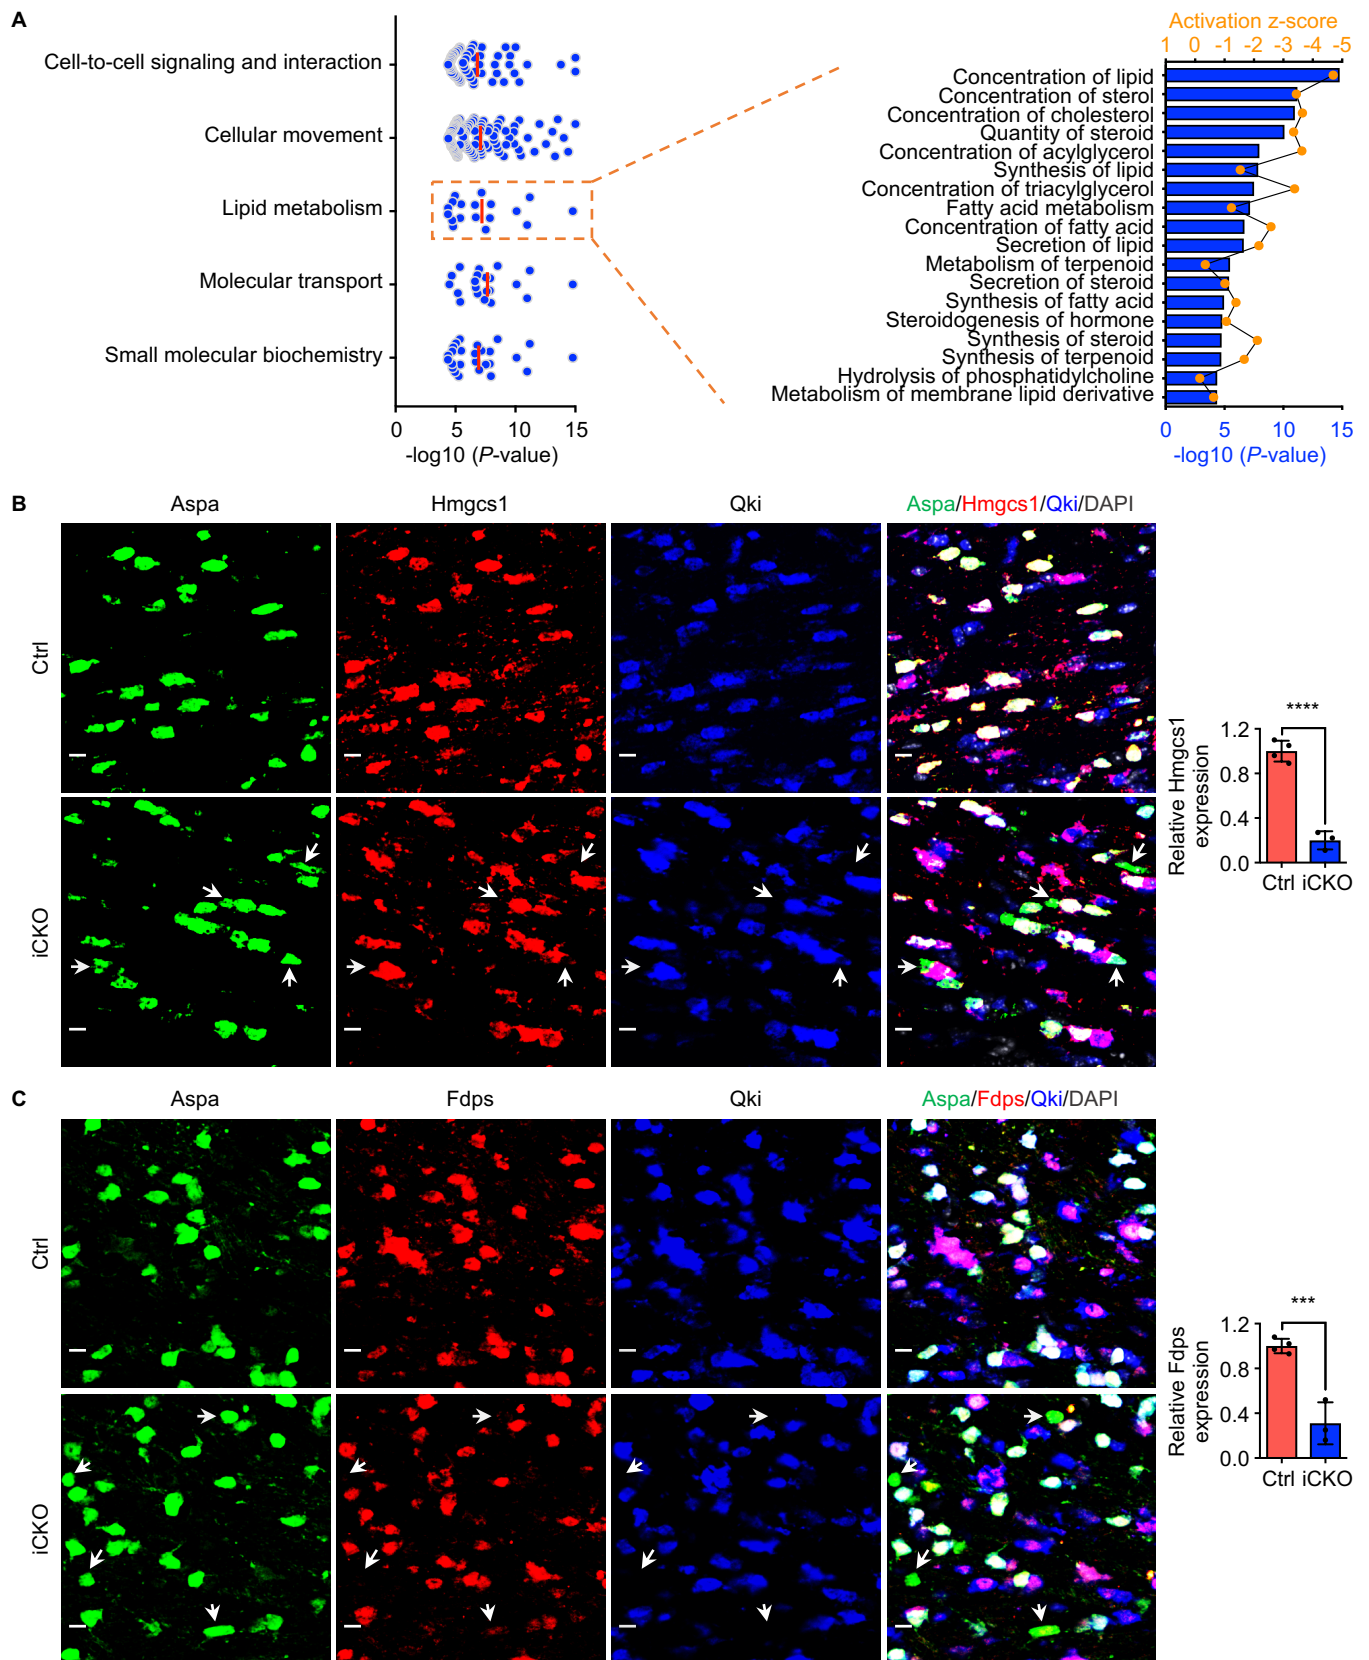

Figure 5-figure supplement 1

Supplement: supp [file elife-60467-supp-v1.zip › elife_poa_e60467_Figure_5_figure_supplement_1.pdf]

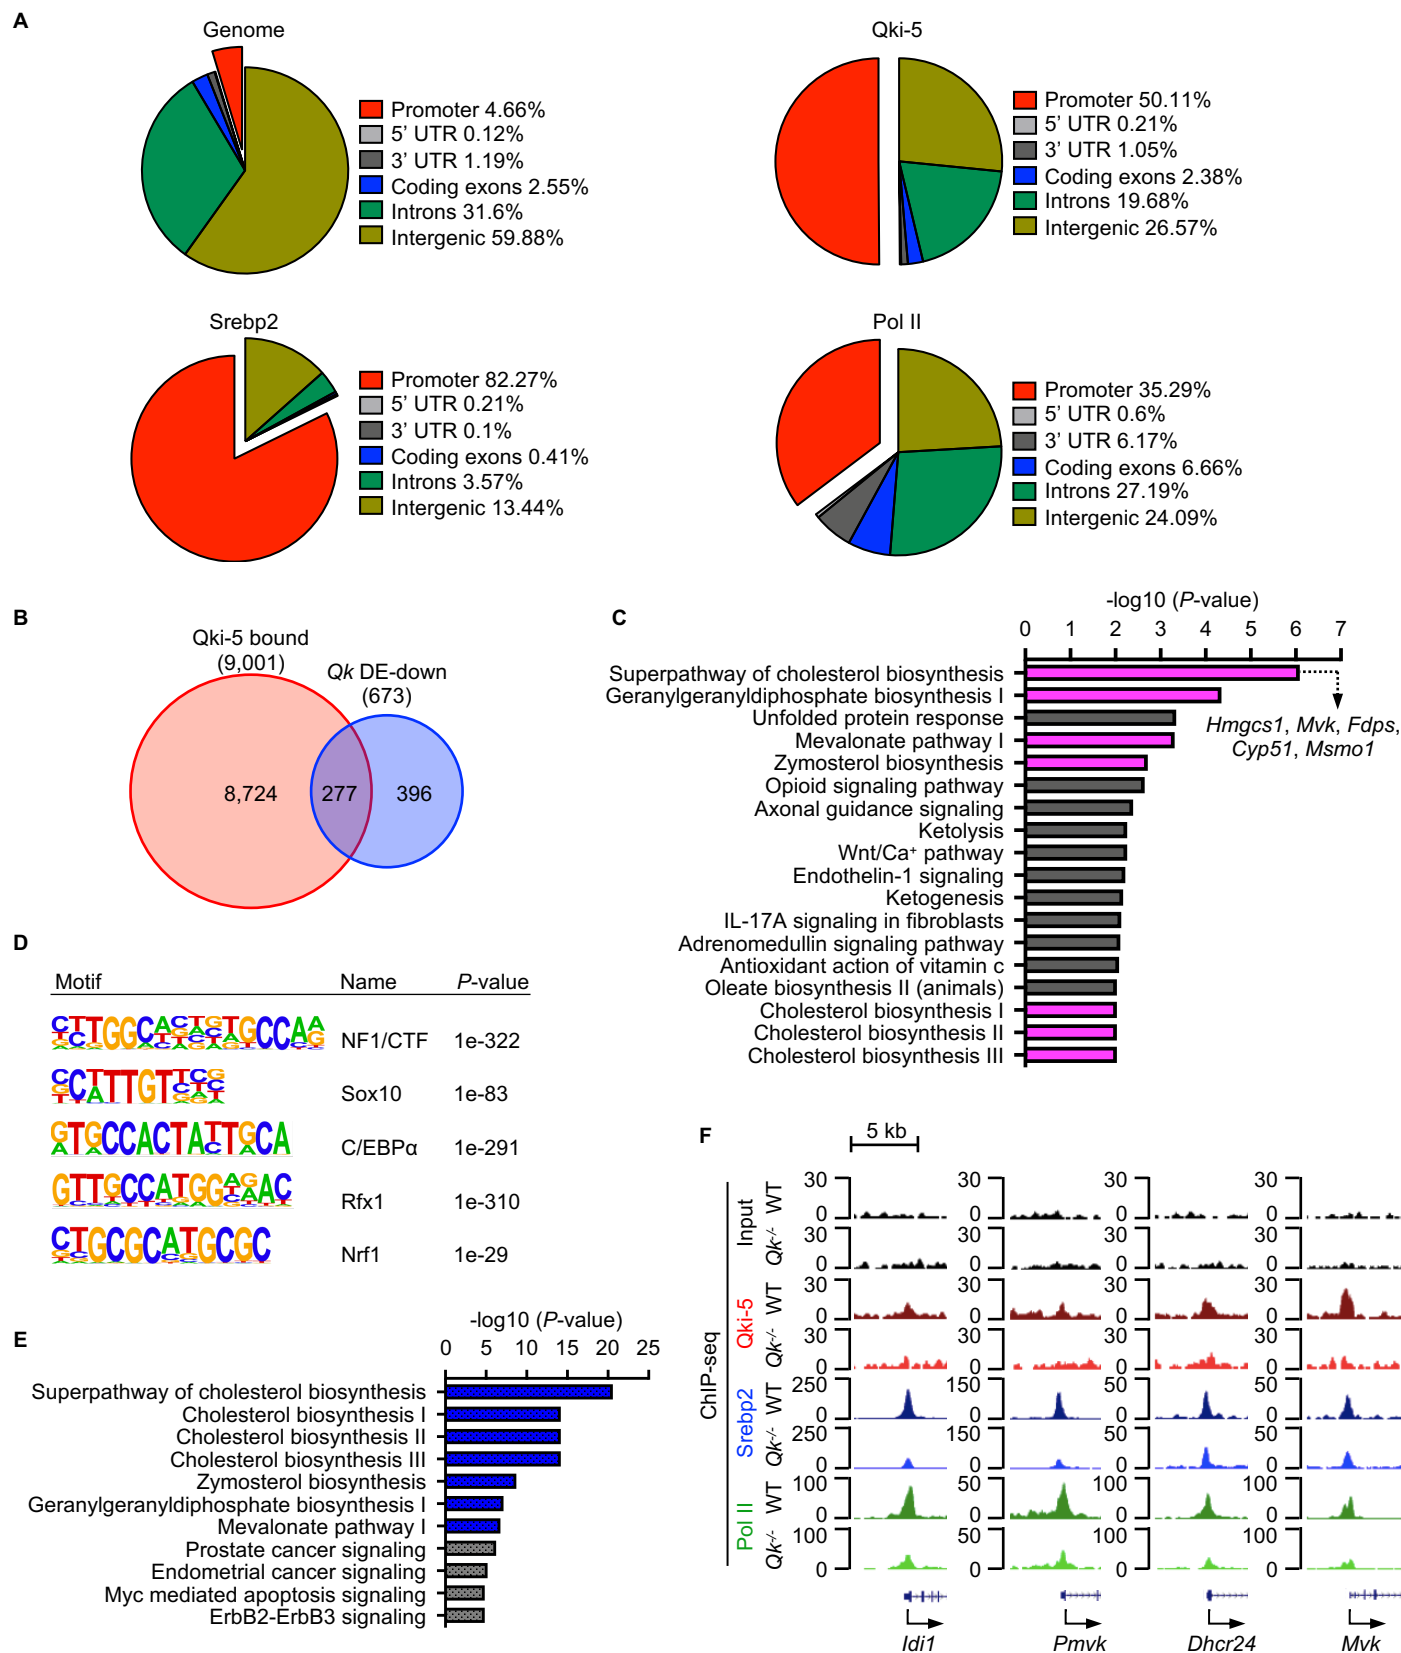

Figure 6-figure supplement 1

Supplement: supp [file elife-60467-supp-v1.zip › elife_poa_e60467_Figure_6_figure_supplement_1.pdf]
